# Supplementary material for: miRNA-720 Controls Stem Cell Phenotype, Proliferation and Differentiation of Human Dental Pulp Cells
Source: PLoS One. 2013 Dec 30;8(12):e83545. doi: 10.1371/journal.pone.0083545 (PMC3875457; doi:10.1371/journal.pone.0083545)
Supplement: Table S3 — List of the designed oligonucleotides containing 3 tandem copies of miR-720 predicted target site in NANOG 3′-UTR. Mutant 1 and Mutant 2 correspond to point mutations in the seed sequence of miR-720 predicted target site in NANOG 3′-UTR. (XLSX) [file pone.0083545.s004.xlsx]

## Sheet: Sheet1
Gene name	Direction	Nucleotide Sequence (with XbaI-EcoRI end sequences)
NANOG	Sense	5`-ctagaGTATGGTTGGAGCCTAATCAGCGAGGTTGTATGGTTGGAGCCTAATCAGCGAGGTTGTATGGTTGGAGCCTAATCAGCGAGGTTg-3`
	Anti-sense	5`-aattcAACCTCGCTGATTAGGCTCCAACCATACAACCTCGCTGATTAGGCTCCAACCATACAACCTCGCTGATTAGGCTCCAACCATACt-3`
Mutant 1	Sense	5’-ctagaGTATGGTTGGAGCCTAATGCGCACTGTTGTATGGTTGGAGCCTAATGCGCACTGTTGTATGGTTGGAGCCTAATGCGCACTGTTg-3’
	Anti-sense	5’-aattcAACAGTGCGCATTAGGCTCCAACCATACAACAGTGCGCATTAGGCTCCAACCATACAACAGTGCGCATTAGGCTCCAACCATACt-3’
Mutant 2	Sense	5’-ctagaGTATGGTTGGAGCCTAATACTAACAGTTGTATGGTTGGAGCCTAATACTAACAGTTGTATGGTTGGAGCCTAATACTAACAGTTg-3’
	Anti-sense	5’-aattcAACTGTTAGTATTAGGCTCCAACCATACAACTGTTAGTATTAGGCTCCAACCATACAACTGTTAGTATTAGGCTCCAACCATACt-3’
